# Supplementary material for: Add-on inhaled budesonide in the treatment of hospitalised patients with COVID-19: a randomised clinical trial
Source: PubMed Central journal article supplement — Eur Respir J. 2022 Mar 10;59(3):2103036. doi: 10.1183/13993003.03036-2021 (PMC8832375; doi:10.1183/13993003.03036-2021), 2022-03-10

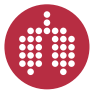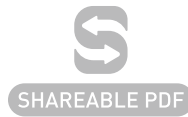

# Add-on inhaled budesonide in the treatment of hospitalised patients with COVID-19: a randomised clinical trial

Alvar Agustí<sup>1,2,3,4</sup>, Gaston De Stefano<sup>5</sup>, Alberto Levi <sup>5</sup>, Xavier Muñoz<sup>4,6,7</sup>, Christian Romero-Mesones<sup>4,6</sup>, Oriol Sibila<sup>1,2,3,4</sup>, Alejandra Lopez-Giraldo<sup>2,3,4</sup>, Vicente Plaza Moral <sup>4,8,9,10</sup>, Elena Curto <sup>4,8,9,10</sup>, Andrés L. Echazarreta <sup>11</sup>, Silvana E. Márquez<sup>11</sup>, Sergi Pascual-Guàrdia<sup>4,12,13</sup>, Salud Santos<sup>2,4,14,15</sup>, Alicia Marin <sup>4,16</sup>, Luis Valdés<sup>17,18,19</sup>, Fernando Saldarini <sup>20</sup>, Clara Salgado<sup>21</sup>, Georgina Casanovas<sup>1,3</sup>, Sara Varea<sup>1,3</sup>, José Ríos<sup>1,3,7</sup> and Rosa Faner<sup>2,3,4</sup>

<sup>1</sup>Hospital Clinic, Barcelona, Spain. <sup>2</sup>Universitat Barcelona, Barcelona, Spain. <sup>3</sup>Institut d'Investigacions Biomèdiques August Pi i Sunyer (IDIBAPS), Barcelona, Spain. <sup>4</sup>CIBER Enfermedades Respiratorias, Spain. <sup>5</sup>Servicio de Neumotisiología, Hospital Francisco Muñiz, Buenos Aires, Argentina. <sup>6</sup>Servei Pneumologia H. Vall d'Hebron, Barcelona, Spain. <sup>7</sup>Biostatistics Unit, Faculty of Medicine, Universitat Autònoma de Barcelona, Barcelona, Spain. <sup>8</sup>Dept of Respiratory Medicine, Hospital de la Santa Creu i Sant Pau, Barcelona, Spain. <sup>9</sup>Institut d'Investigació Biomèdica Sant Pau (IIB Sant Pau), Barcelona, Spain. <sup>10</sup>Dept of Medicine, Universitat Autònoma de Barcelona, Barcelona, Spain. <sup>11</sup>Servicio de Neumonología, Hospital San Juan de Dios de La Plata, Buenos Aires, Argentina. <sup>12</sup>Servei de Pneumologia, Hospital del Mar – IMIM, Barcelona, Spain. <sup>13</sup>Universitat Pompeu Fabra, Barcelona, Spain. <sup>14</sup>Dept of Pulmonary Medicine, Bellvitge University Hospital, L'Hospitalet de Llobregat, Barcelona, Spain. <sup>15</sup>Institut d'Investigació Biomèdica de Bellvitge – IDIBELL, Barcelona, Spain. <sup>16</sup>Hospital Universitari Germans Trias i Pujol, Badalona, Spain. <sup>17</sup>Servicio de Neumología, Complejo Hospitalario Universitario de Santiago, Santiago de Compostela, Spain. <sup>18</sup>Instituto de Investigaciones Sanitarias (IDIS), Santiago de Compostela, Spain. <sup>19</sup>Universidad de Santiago de Compostela, Santiago de Compostela, Spain. <sup>20</sup>Sección de Neumotisiología, Hospital Donación Francisco Santojanni, Buenos Aires, Argentina. <sup>21</sup>Centro de Educación Médica e Investigaciones Clínicas Norberto Quirno, Buenos Aires, Argentina.

Corresponding author: Alvar Agustí ([aagusti@clinic.cat](mailto:aagusti@clinic.cat))

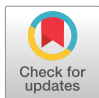

Shareable abstract (@ERSpublications)

The addition of inhaled budesonide to usual care is safe and may reduce the risk of disease progression in patients hospitalised because of COVID-19 pneumonia <https://bit.ly/3tEQo3p>

**Cite this article as:** Agustí A, De Stefano G, Levi A, *et al.* Add-on inhaled budesonide in the treatment of hospitalised patients with COVID-19: a randomised clinical trial. *Eur Respir J* 2022; 59: 2103036 [DOI: 10.1183/13993003.03036-2021].

This single-page version can be shared freely online.

Copyright ©The authors 2022.

This version is distributed under the terms of the Creative Commons Attribution Non-Commercial Licence 4.0. For reproduction rights and permissions contact [permissions@ersnet.org](mailto:permissions@ersnet.org)

Received: 30 Nov 2021  
Accepted: 28 Dec 2021

*To the Editor:*

SARS-CoV-2 vaccines have been extremely effective in reducing the incidence of severe coronavirus disease 2019 (COVID-19) [1, 2], but effective and safe treatments for acute infection are still limited [3, 4]. An uncontrolled pulmonary inflammatory response to SARS-CoV-2 is considered a key pathogenic mechanism of COVID-19 progression [5], so systemic dexamethasone is recommended in severe cases [4, 6]. On the other hand, in very mild patients at home, inhaled corticosteroids (ICS) may prevent disease progression [7–10]. Whether ICS can also prevent disease progression in patients hospitalised because of COVID-19 has not been explored previously. Accordingly, we designed an investigator-initiated, open-label, randomised clinical trial (RCT) to explore the efficacy of adding inhaled budesonide to usual care to prevent disease progression in patients hospitalised because of COVID-19 pneumonia. We also carefully monitored the safety of this intervention since there are concerns about the use of systemic corticosteroids in other viral (influenza) lung infections [11].

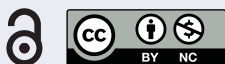

Supplement: ERJ-03036-2021.Shareable.pdf [file ERJ-03036-2021.Shareable.pdf]
